# Supplementary material for: Supercooling suppression in the tetrahydrofuran clathrate hydrate formation
Source: Royal Society of Chemistry journal article supplement (doi:10.1039/d2ce00645f), 2022-01-01
Supplement: d2ce00645f1.pdf [file d2ce00645f1.pdf]

Supplementary Information

# Supercooling suppression in the tetrahydrofuran clathrate hydrate formation

*Hironobu Machida<sup>1,\*</sup>, Takeshi Sugahara<sup>2,3,\*</sup>, Izumi Hirasawa<sup>4</sup>*

<sup>1</sup> Solution Development Division, Electric Works Company, Panasonic Corporation, Japan

<sup>2</sup> Division of Chemical Engineering, Graduate School of Engineering Science, Osaka University,  
Japan

<sup>3</sup> Division of Energy and Photochemical Engineering, Research Center for Solar Energy Chemistry,  
Graduate School of Engineering Science, Osaka University, Japan

<sup>4</sup> Department of Applied Chemistry, Waseda University, Japan

\*Corresponding authors: machida.hi@jp.panasonic.com (HM), sugahara@cheng.es.osakau.ac.jp  
(TS)

## Transmission electron microscopic observation

Transmission electron microscope (TEM, JEOL, ARM200F, acceleration voltage: 200 kV) was performed to investigate the particle size of  $\text{Ag}_3\text{PO}_4$  and  $\text{AgO}$  in the THF aqueous solution ( $x = 0.0556$ ). For each sample, the solution was dropped on to a microgrid with a carbon support film at room temperature, and the solvent was volatilized and dried to obtain a sample for observation. Electron beam diffraction patterns were obtained to identify the crystal structure.

## Results

**Figures S1** and **S2** show the TEM images and the electron beam diffraction patterns of the nanoparticles formed from  $\text{Ag}_3\text{PO}_4$  or  $\text{AgO}$  in the THF aqueous solution, respectively.

When  $\text{Ag}_3\text{PO}_4$  was added in the THF aqueous solution, the nanoparticles (in several tens of nanometer order) existed with the original chemical (in micrometer order, not shown) before added in THF aqueous solution. Electron beam diffraction patterns suggested that the nanoparticles were mostly Ag, although the pattern did not agree perfectly with that of reference.

In the case of  $\text{AgO}$  in the THF aqueous solution, a number of nanoparticles from 5 nm to 20 nm existed with the original chemical (in micrometer order, not shown) before added in THF aqueous solution. In addition, a nanoparticle seemed to be crystalline. The major spots in the electron beam diffraction pattern can be indexed to Ag. Unattributed spots are likely to be  $\text{Ag}_2\text{O}$  or  $\text{AgO}$ , making it difficult to judge.

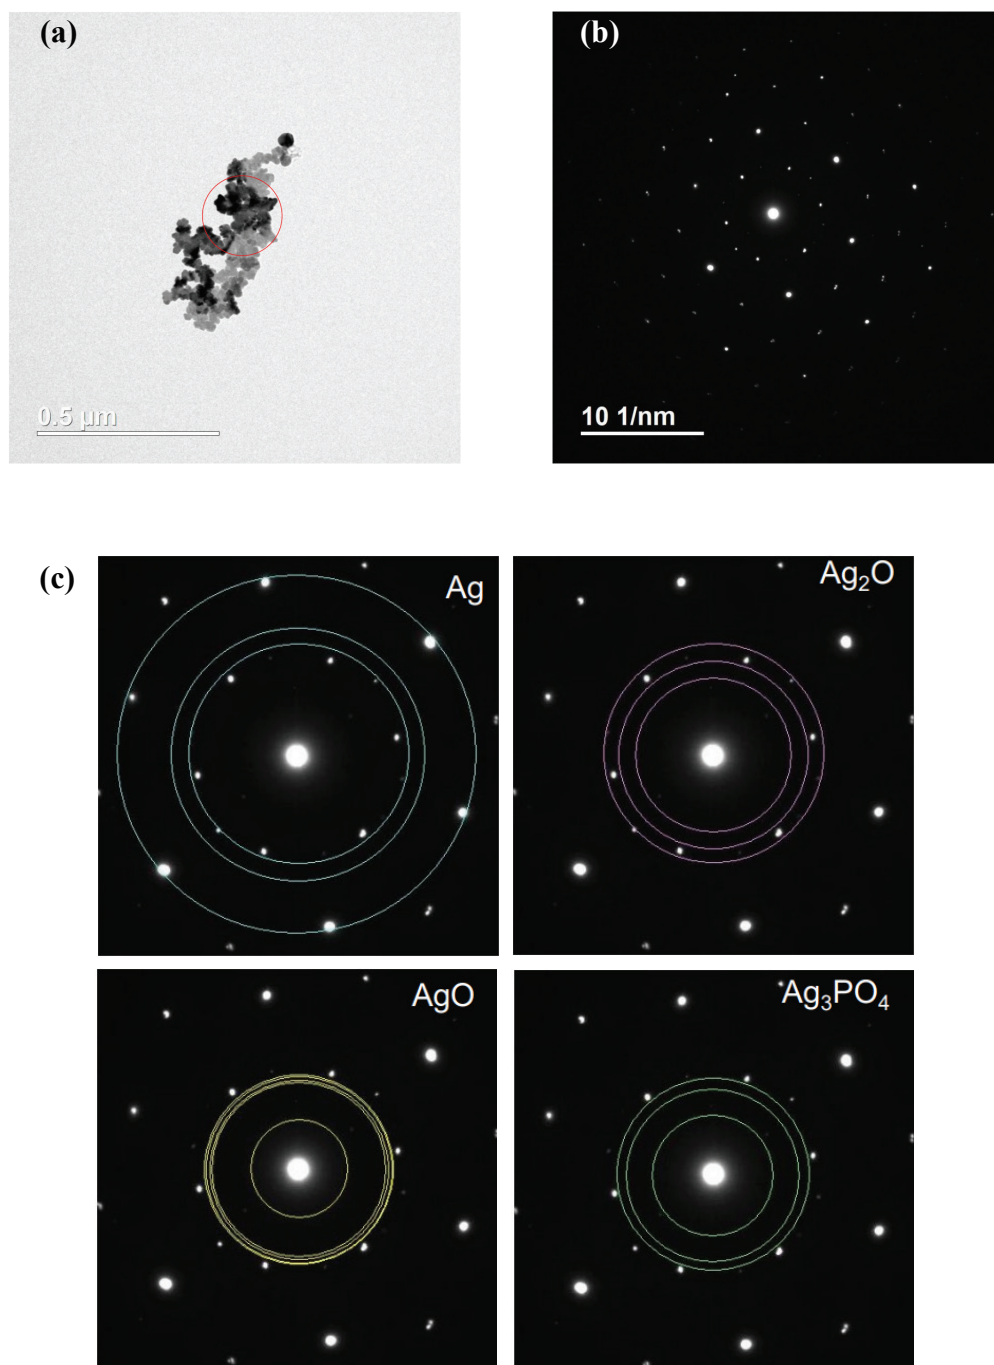

**Figure S1.** (a) TEM image of nanoparticles after  $\text{Ag}_3\text{PO}_4$  was added in the THF aqueous solution. (b) Electron beam diffraction patterns of (a) red circle. (c) Superimposition of electron beam diffraction patterns and calculated values (color rings) of Ag,  $\text{Ag}_2\text{O}$ , AgO, and  $\text{Ag}_3\text{PO}_4$ .

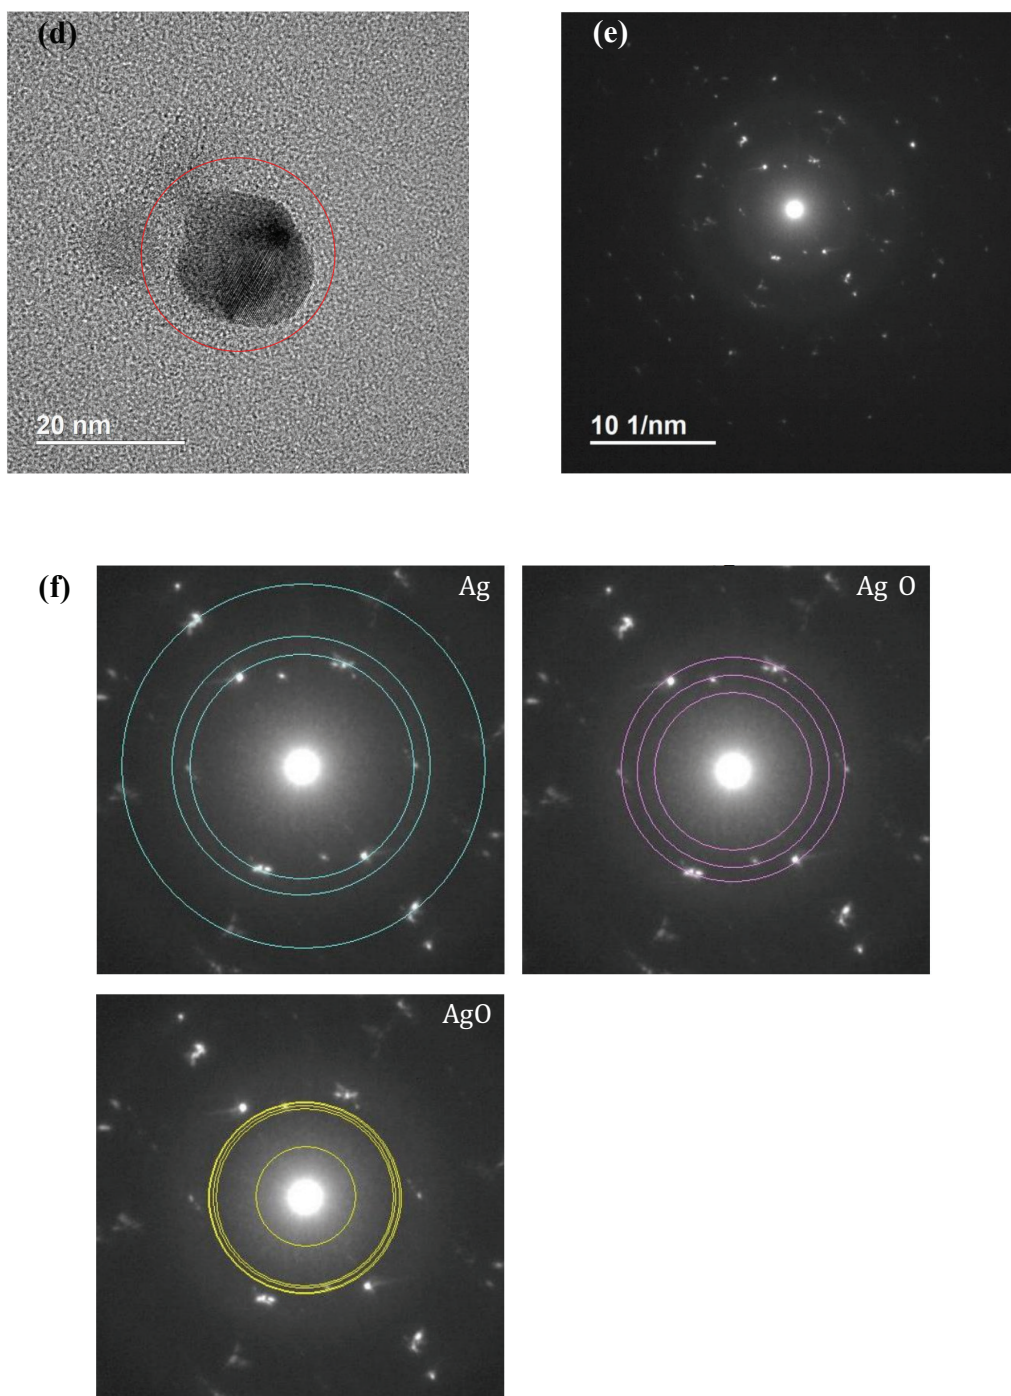

**Figure S2.** (d) TEM image of nanoparticles after AgO was added in the THF aqueous solution. (e) Electron beam diffraction patterns of (d) red circle. (f) Superimposition of electron beam diffraction patterns and calculated values (color rings) of Ag, Ag<sub>2</sub>O, and AgO.
